# Supplementary material for: The Friend of GATA Transcriptional Co-Regulator, U-Shaped, Is a Downstream Antagonist of Dorsal-Driven Prohemocyte Differentiation in Drosophila
Source: PLoS One. 2016 May 10;11(5):e0155372. doi: 10.1371/journal.pone.0155372 (PMC4862636; doi:10.1371/journal.pone.0155372)
Supplement: S1 File — (XLSX) [file pone.0155372.s007.xlsx]

## Sheet: Sheet1
Fig 1.	Dorsal regulates prohemocyte population size and differentiation (panels A-C)
	area μm2	area μm2				area μm2	area μm2
dome/+	lymph gland	Odd-expressing cells	ratio		dome>dlRNAI	lymph gland	Odd-expressing cells	ratio
1	14982	6354	0.424109		1	16983	7644	0.450097
2	9380	3373	0.359595		2	12063	5845	0.48454
3	27855	9166	0.329061		3	13686	8419	0.615154
4	17308	6778	0.391611		4	12046	7105	0.589822
5	10396	3347	0.321951		5	8478	5644	0.665723
6	12992	4948	0.38085		6	11729	8039	0.685395
7	12706	5840	0.459625		7	10713	8028	0.74937
8	14709	8271	0.562309		8	13748	7027	0.511129
9	9199	3479	0.378193		9	18359	10013	0.5454
10	19626	5953	0.303322		10	16066	8204	0.510644
11	18901	4717	0.249564		11	9254	7706	0.832721
12	19117	5487	0.287022		12	7305	5800	0.793977
13	13058	5468	0.418747		13	13839	9229	0.666883
14	12153	3431	0.282317		14	14063	9854	0.700704
15	4468	2666	0.596688		15	14098	8190	0.580933
16	15219	7052	0.463368		16	11303	4345	0.384411
17	18735	8959	0.478196		17	20478	7758	0.378846
18	13042	6076	0.465879		18	17287	8177	0.473014
ave	14658.1	5631.39	0.397356			13416.6	7612.61	0.589931
std	5046.92	1895.48	0.0931315			3396.54	1433.7	0.130251
ttest		0.000832575	1.22934e-05
Fig 1.	Dorsal regulates prohemocyte population size and differentiation (panels D-F)
	area μm2	area μm2				area μm2	area μm2
Tep/+	lymph gland	Odd-expressing cells	ratio		Tep>dl	lymph gland	Odd-expressing cells	ratio
1	4145	2397	0.578287		1	12438	4826	0.388005
2	4646	2484	0.534653		2	12672	5649	0.445786
3	9159	6735	0.735342		3	6676	2250	0.337028
4	8833	6354	0.719348		4	6244	2413	0.386451
5	9134	5012	0.548719		5	8529	5104	0.598429
6	12270	4822	0.392991		6	10114	5944	0.5877
7	9709	5557	0.572356		7	8747	1797	0.205442
8	8123	3333	0.410316		8	8274	3624	0.437999
9	2969	2887	0.972381		9	10127	1766	0.174385
10	3288	2123	0.645681		10	11055	962	0.0870194
11	7139	4312	0.604006		11	7635	2799	0.366601
12	6434	2926	0.454772		12	12577	2687	0.213644
13	6761	5217	0.771631		13	10238	5880	0.574331
14	12587	6685	0.531104		14	9191	3069	0.333914
15	6305	3888	0.616653		15	6444	3005	0.466325
16	5112	3186	0.623239		16	6790	2279	0.335641
17	8631	5274	0.611053		17	9768	2456	0.251433
18	9500	6817	0.717579		18	7989	2520	0.315434
19	7213	4249	0.589075		19	6356	2436	0.38326
20	6895	3676	0.53314		20	3850	1845	0.479221
21	5934	3502	0.590158		21	6456	3104	0.480793
ave	7370.81	4354.1	0.607261			8674.76	3162.62	0.373754
std	2540.55	1466.73	0.126103			2318.33	1421.88	0.133833
ttest		0.00636652	6.751e-07
Fig 1.	Dorsal regulates prohemocyte population size and differentiation (panels G-I)
	lobes	lobes	Total
	< 5 lamellocytes	>5 lamellocytes
Tep/+	21	3	24
Tep>dl	8	14	22
Total	29	17	46
	P = 0.004
Fig 1.	Dorsal regulates prohemocyte population size and differentiation (panels J-L)
	area μm2	area μm2				area μm2	area μm2
dome/+	lymph gland	Odd-expressing cells	ratio		dome>DifRNAI	lymph gland	Odd-expressing cells	ratio
1	7486	4642	0.620091		1	6045	3707	0.613234
2	8782	4775	0.543726		2	4147	1946	0.469255
3	5057	2464	0.487245		3	5332	2640	0.495124
4	12930	7484	0.578809		4	4567	2334	0.511058
5	5172	2825	0.54621		5	7122	3306	0.464195
6	7291	4722	0.647648		6	4386	2158	0.49202
7	18011	4522	0.251069		7	8397	2920	0.347743
8	20298	5081	0.25032		8	5778	2918	0.505019
9	7055	3700	0.524451		9	7845	3055	0.38942
10	6581	2520	0.382921		10	6596	2173	0.329442
11	6264	3013	0.481003		11	6002	3245	0.540653
12	4727	2952	0.624498		12	3140	1817	0.578662
13	2583	1590	0.615563		13	3547	1599	0.450803
14	2584	1789	0.692337		14	7015	2322	0.331005
15	7479	2735	0.365691		15	2617	1632	0.623615
16	9078	4521	0.498017		16	10019	5187	0.517716
17	8057	4425	0.549212		17	14446	7956	0.550741
18	8311	4818	0.579714		18	8378	3967	0.473502
19	7437	2902	0.390211		19	7813	3430	0.439012
ave	8167.53	3762.11	0.506776			6483.79	3069.05	0.480117
std	4415.46	1390.84	0.12343			2695.1	1447.58	0.0838807
ttest		0.151692	0.227057
Fig 1.	Dorsal regulates prohemocyte population size and differentiation (panels M-O)
	area μm2	area μm2				area μm2	area μm2
Tep/+	lymph gland	Odd-expressing cells	ratio		Tep>cactRNAi	lymph gland	Odd-expressing cells	ratio
1	17852	11044	0.618642		1	22458	10003	0.445409
2	14982	8678	0.579228		2	13772	1517	0.110151
3	13445	7702	0.572852		3	9545	4993	0.523101
4	13724	7032	0.512387		4	11201	5728	0.511383
5	10835	6628	0.611721		5	13721	4407	0.321187
6	5555	3767	0.678128		6	13952	7209	0.5167
7	5506	3105	0.56393		7	10829	3043	0.281005
8	7224	3722	0.515227		8	5455	3080	0.56462
9	8174	5820	0.712014		9	7975	4219	0.529028
10	6699	2338	0.349007		10	5356	3092	0.577296
11	6598	5499	0.833434		11	9817	4982	0.507487
12	5267	5617	1.06645		12	10082	4265	0.423031
13	10792	5389	0.499351		13	15459	5525	0.357397
14	12373	4209	0.340176		14	10007	3295	0.32927
15	18233	11046	0.605825		15	19447	4064	0.208978
16	16203	10502	0.648152		16	16703	5121	0.306592
17	15139	10250	0.677059		17	7752	2971	0.383256
18	11687	9997	0.855395		18	12481	5194	0.416153
19	5102	3692	0.723638		19	5820	3919	0.673368
20	6210	4698	0.756522		20	7913	3813	0.481865
21	7685	5052	0.657385		21	14043	6315	0.44969
22	9287	5395	0.58092		22	13880	4138	0.298127
23	6478	4453	0.687404		23	10721	3999	0.373006
24	7041	3610	0.512711		24	12366	7921	0.640547
ave	10087.1	6218.54	0.631565			11698.1	4700.54	0.426194
std	4162.07	2645.45	0.152408			4147.89	1778.22	0.132895
ttest		0.0138631	7.0147e-06
Fig 1.	Dorsal regulates prohemocyte population size and differentiation (panels P-R)
	lobes	lobes	Total
	< 5 lamellocytes	>5 lamellocytes
Tep/+	22	2	24
Tep>cactRNAI	15	9	24
Total	37	11	48
	P = 0.0182

## Sheet: Sheet2
Fig 2							Fig 2
Dorsal controls the level of Ush expression (panels A,B,I)							Dorsal controls the level of Ush expression (panels C,D,I)
	densitometric			densitometric				densitometric			densitometric
	mean			mean				mean			mean
dome,+			dome>dlRNAI				Tep/+			Tep>dl
1	3945		1	5440			1	3380		1	3944
2	6016		2	9505			2	3389		2	3487
3	4005		3	5351			3	4318		3	4699
4	6068		4	7315			4	6302		4	4499
5	3808		5	4059			5	7690		5	3268
6	3482		6	7345			6	3485		6	2567
7	5490		7	4353			7	5794		7	4329
8	5795		8	5257			8	7804		8	3494
9	7155		9	6025			9	4487		9	2672
10	4030		10	10658			10	5092		10	3170
11	5533		11	10090			11	5391		11	3277
12	4184		12	7868			12	5674		12	5169
13	5743		13	10216			13	5592		13	4391
14	4013		14	8206			14	3607		14	3576
							15	3283		15	3812
ave	4947.64			7263.43
std	1098.57			2167.93			ave	5019.2			3756.93
							std	1449.52			720.234
ttest	0.00136475
							ttest	0.00417808
Fig 2							Fig 2
Dorsal controls the level of Ush expression (panels E,F,I)							Dorsal controls the level of Ush expression (panels G-I)
	densitometric			densitometric				densitometric			densitometric
Tep/+	mean		Tep>cactRNAI	mean			dome/+	mean		dome>DifRNAI	mean
1	4115		1	2176			1	6987		1	5216
2	6348		2	2890			2	4738		2	7533
3	4432		3	3147			3	7281		3	4516
4	3959		4	2562			4	5555		4	5850
5	3909		5	1887			5	5770		5	6815
6	4978		6	1885			6	6323		6	5971
7	4842		7	1801			7	5098		7	5824
8	4921		8	2544			8	5590		8	5944
9	4678		9	2743			9	4725		9	6594
10	5248		10	2224			10	4650		10	7273
11	5213		11	1854			11	5026		11	4425
12	4910		12	2676			12	6097		12	4381
13	3839		13	2447			13	7469		13	6761
14	4710		14	1958			14	5567		14	4645
15	5687		15	2118			15	5320		15	5565
16	3396		16	2685
17	4471		17	3322			ave	5746.4			5820.87
							std	886.72			1002.89
ave	4685.65			2407
std	708.105			454.581			ttest	0.418326
ttest	1.10193e-11
Fig 2	Dorsal controls the level of Ush expression (panels J-L)
	densitometric			densitometric
	mean		dl/+	mean
1	3665		1	7437
2	4708		2	5340
3	4690		3	6874
4	3957		4	4807
5	2826		5	6764
6	4123		6	9382
7	2648		7	3781
8	6139		8	5109
9	3250		9	6067
10	3071		10	6828
11	4650		11	9963
12	6377		12	11988
13	5674		13	12845
14	7601		14	7366
15	4300		15	10776
16	5660		16	7810
17	7783		17	10063
18	5681		18	4614
19	7154		19	7765
ave	4945.11			7662.05
std	1540.93			2497.82
ttest	0.000233201
Fig 2
Dorsal controls the level of Ush expression (panel M)
	densitometric			densitometric
Antp/+	mean		Antp>dl	mean
1	6951		1	8030
2	6810		2	6724
3	5166		3	5226
4	6309		4	3686
5	7677		5	3858
6	5571		6	3805
7	7842		7	4886
8	5624		8	5519
9	4411		9	3468
10	5481		10	8761
11	4989		11	5021
12	5691		12	5791
13	5133		13	4394
14	9127		14	3978
15	7914		15	4206
ave	6313.07			5156.87
std	1304.28			1543.52
ttest	0.0206956
Fig 2
Dorsal controls the level of Ush expression (panel M)
Eater/+			Eater>dlGOF
1	4629		1	4941
2	10119		2	6358
3	8808		3	4539
4	6976		4	5768
5	6648		5	3428
6	6507		6	2952
7	5796		7	7570
8	7158		8	8854
9	6655		9	5939
10	14156		10	6984
11	14935		11	8606
12	5563		12	7823
13	8198		13	6990
14	6976		14	7136
15	7377		15	4445
16	8160		16	9718
17	9468		17	5213
18	3549		18	3482
19	3468		19	4651
ave	7639.26			6073.53
std	2924.05			1895
ttest	0.0329715
Fig 3. Ush functions in prohemocytes to promote multipotency and block differentiation (panels A-C)
		lobes	lobes	Total
		< 5 lamellocytes	>5 lamellocytes
	dome/+	15	3	18
	dome>ushRNAi	8	12	20
	Total	23	15	38
		P = 0.008
Fig 3. Ush functions in prohemocytes to promote multipotency and block differentiation (panels D-F)
	area μm2		area μm2				area μm2	area μm2
Tep/+	lymph gland		Odd-expressing cells			Tep>UshGOF	lymph gland	Odd-expressing cells
1	7743		1492			1	1805	1279
2	6676		709			2	2042	1107
3	4302		1341			3	1871	1428
4	6113		1627			4	1837	1027
5	5247		917			5	3384	2029
6	6174		953			6	4951	1710
7	4152		1615			7	1937	1031
8	2287		625			8	2052	1179
9	2596		1019			9	2250	1779
10	2696		704			10	2232	1103
11	1705		834			11	4486	2774
ave	4517.36		1076				2622.45	1495.09
std	1929.67		358.799				1076.53	516.756
ttest			0.0247954

## Sheet: Sheet3
Fig 4	Ush limits Dorsal-driven prohemocyte differentiation (panels A-C)
	area μm2	area μm2				area μm2	area μm2
	lymph gland	Odd-expressing cells	ratio			lymph gland	Odd-expressing cells	ratio
cactRNAi					cactRNAi, ush GOF
1	14601	3234	0.221492		1	3895	2098	0.538639
2	9528	4708	0.494123		2	3982	1916	0.481165
3	11663	6622	0.567778		3	4776	2189	0.458333
4	4394	2291	0.521393		4	5190	3030	0.583815
5	6112	2855	0.467114		5	4834	2792	0.577576
6	10062	2464	0.244882		6	3875	2412	0.622452
7	11123	4381	0.393869		7	11771	7680	0.652451
8	8270	4336	0.524305		8	12094	5290	0.437407
9	7169	3348	0.467011		9	9091	5149	0.566384
10	7446	0	0		10	9956	5027	0.504922
11	8405	0	0		11	5038	3621	0.718738
12	4157	2345	0.564109		12	5536	3829	0.691655
13	4126	2054	0.497819		13	5846	3174	0.542935
14	11224	6072	0.540984		14	6903	4319	0.62567
15	10083	6875	0.681841		15	11169	6059	0.542484
16	5563	3053	0.548805		16	6054	5208	0.860258
17	5901	3574	0.60566		17	9557	5244	0.548708
18	6945	3852	0.554644		18	7823	5394	0.689505
19	5767	2318	0.401942		19	6154	3794	0.61651
20	5103	2156	0.422497		20	5869	3521	0.599932
21	5670	4099	0.722928		21	8052	4114	0.510929
22	5505	2117	0.384559		22	13121	8129	0.619541
ave	7673.5	3307	0.446716			7299.36	4272.23	0.590455
std	2778.06	1740.45	0.182575			2817.73	1645.84	0.0937272
ttest		0.0359444	0.00153143
Fig 4	Ush limits Dorsal-driven prohemocyte differentiation (panels D-F)
							lobes	lobes	Total
							< 5 lamellocytes	>5 lamellocytes
					Tep-Gal4 X	cactRNAi	13	8	21
					Tep-Gal4 X	ushGOF; cactRNAi	20	2	22
						Total	33	10	43
							P= 0.0281
Fig 4	Ush limits Dorsal-driven prohemocyte differentiation (panels G-I)
	area μm2	area μm2				area μm2	area μm2
	lymph gland	Odd-expressing cells				lymph gland	Odd-expressing cells
ush/+					dl/ush
1	3850	1793			1	5240	3994
2	4136	1669			2	2836	2033
3	4771	2582			3	8569	5257
4	4021	2244			4	9130	5290
5	3146	1604			5	4185	2884
6	3852	2104			6	4413	3405
7	3632	1702			7	2921	2342
8	3277	1708			8	4760	2942
9	5295	2785			9	4765	3289
10	5947	2227			10	10247	6428
11	5148	3023			11	9951	6618
12	5508	2021			12	6804	4933
13	5748	1561			13	8536	8046
14	4673	1899			14	6326	5129
15	4686	1972			15	5614	3791
16	4029	1992			16	5707	4022
17	5811	2142			17	5105	3864
18	6150	3170			18	4250	2935
ave	4648.89	2122.11				6075.5	4289
std	925.206	467.352				2238.16	1564.26
t-test		1.16936e-05
Fig 4	Ush limits Dorsal-driven prohemocyte differentiation (panels J-M)
	lobes	lobes	Total
	< 5 lamellocytes	>5 lamellocytes
cact/+	21	7	28
ush/+	19	7	26
cact/ush	10	20	30
Total	50	34	84
		Chi-square	13.307
		degrees of freedom	2
		p-value	0.0012895
		Yate's chi-square	11.127
		Yate's p-value	0.00383533
			Fig 5: Prohemocyte-specific knockdown of Dorsal promotes crystal cell differentiation (panels A-D)
dome/+	Total Cells	crystal cells	ratio		dome>dlRNAI	Total Cells	crystal cells	ratio
1	431	56	0.12993		1	428	24	0.0560748
2	466	36	0.0772532		2	427	51	0.119438
3	522	21	0.0402299		3	445	34	0.0764045
4	764	57	0.0746073		4	398	36	0.0904523
5	381	59	0.154856		5	380	23	0.0605263
6	1120	101	0.0901786		6	535	14	0.0261682
7	683	47	0.0688141		7	887	17	0.0191657
8	709	59	0.0832158		8	853	65	0.0762016
9	383	30	0.078329		9	1032	83	0.0804264
10	558	35	0.062724		10	745	52	0.0697987
11	639	90	0.140845		11	429	115	0.268065
12	195	42	0.215385		12	300	51	0.17
13	387	60	0.155039		13	252	45	0.178571
14	846	94	0.111111		14	479	33	0.0688935
15	430	110	0.255814		15	268	10	0.0373134
16	443	60	0.13544		16	516	63	0.122093
17	469	193	0.411514		17	285	32	0.112281
18	609	234	0.384236		18	342	81	0.236842
19	283	80	0.282686		19	414	33	0.0797101
20	362	53	0.146409		20	194	38	0.195876
21	216	41	0.189815		21	160	52	0.325
22	158	41	0.259494		22	217	25	0.115207
23	331	99	0.299094		23	260	23	0.0884615
24	215	75	0.348837		24	194	32	0.164948
25	190	48	0.252632		25	154	41	0.266234
26	213	144	0.676056		26	142	20	0.140845
27	216	35	0.162037		27	309	20	0.0647249
28	86	26	0.302326		28	179	24	0.134078
ave		72.3571	0.199604				40.6071	0.122993
std		48.5381	0.137071				23.4191	0.0764521
ttest		0.00199152	0.00748866
Fig 6	Dorsal has no effect on Srp expression (panels A,B,G)
	densitometric					densitometric
dome,+	mean				dome>dlRNAI	mean
1	10505				1	11078
2	9563				2	8954
3	9837				3	5772
4	10800				4	6471
5	7724				5	8895
6	9044				6	11519
7	6570				7	7026
8	7466				8	5981
9	5150				9	6792
10	7209				10	5924
11	6815				11	5144
12	10708				12	5414
ave	8449.25					7414.17
std	1791.01					2089.46
ttest	0.112827
Fig 6	Dorsal has no effect on Srp expression (panels C,D,G)
	densitometric					densitometric
Tep/+	mean				Tep>dl	mean
1	5776				1	5837
2	6240				2	6156
3	7011				3	9450
4	8639				4	7632
5	6090				5	8581
6	6360				6	7916
7	9707				7	10427
8	10532				8	7779
9	7331				9	11239
10	6976				10	10702
11	11077				11	10311
12	10621				12	10657
13	10345				13	10663
average	8208.08					9026.92
std	1918.79					1757.95
t-test	0.143307
Fig 6	Dorsal has no effect on Srp expression (panels E-G)
	densitometric					densitometric
Tep/+	mean				Tep>cactRNAi	mean
1	10054				1	8598
2	10082				2	6922
3	9343				3	6962
4	9166				4	7113
5	8570				5	10068
6	11102				6	11200
7	10027				7	8676
8	11921				8	10173
9	8261				9	9818
10	8884				10	10862
11	12840				11	10969
12	11961				12	10424
average	10184.2					9315.42
std	1410.1					1541.17
t-test	0.18172

## Sheet: Sheet4
Fig 7	Lwr maintains Ush to block lamellocyte differentiation (panels A-C)
tep/+						tep>lwrRNAi
1	5290					1	7074
2	5731					2	6456
3	3185					3	8069
4	11946					4	8965
5	10639					5	7450
6	10869					6	7898
7	6981					7	2830
8	5970					8	2828
9	7186					9	4331
10	8812					10	4298
11	10135					11	6288
12	12077					12	6205
13	5891					13	5944
14	9522					14	6685
15	10900					15	5222
16	9362					16	7051
ave	8406						6099.62
std	2604.04						1733.49
ttest	0.00415752
Fig 7	Lwr maintains Ush to block lamellocyte differentiation (panels D-G)
	lobes	lobes	Total
	< 5 lamellocytes	>5 lamellocytes
lwr/+	18	2	20
ush/+	14	6	20
lwr/ush	2	18	20
Total	34	26	60
		Chi-square	24.823
		degrees of freedom	2
		p-value	4.07e-06
		Yate's chi-square	21.411
		Yate's p-value	2.242e-05
Fig 8	Ush and Lwr block proliferation in lymph glands from early third instar larvae (panels A-F)
wt	Total Cells	HP3 cells	ratio		ushvx22/r24	Total Cells	HP3 cells
1	434	18	0.0414747		1	321	28	0.0872274
2	511	17	0.0332681		2	415	31	0.0746988
3	283	31	0.109541		3	416	38	0.0913462
4	263	10	0.0380228		4	270	18	0.0666667
5	384	24	0.0625		5	273	31	0.113553
6	381	21	0.0551181		6	112	22	0.196429
7	251	13	0.0517928		7	250	28	0.112
8	283	15	0.0530035		8	216	18	0.0833333
9	105	15	0.142857		9	128	16	0.125
10	210	12	0.0571429		10	167	17	0.101796
11	413	25	0.0605327		11	268	21	0.0783582
12	109	17	0.155963		12	161	24	0.149068
13	101	11	0.108911		13	160	24	0.15
14	786	19	0.024173		14	236	39	0.165254
ave	322.429	17.7143	0.0710215			242.357	25.3571	0.113909
std	178.2	5.7125	0.0398205			91.9811	7.18736	0.0372703
ttest		0.0030293	0.00438393

## Sheet: Sheet5
Fig 8	Ush and Lwr block proliferation in lymph glands from early third instar larvae (panels G-K)
lwr/+	Total Cells	HP3 cells	ratio		ush/+	Total Cells	HP3 cells	ratio		lwr/ush	Total Cells	HP3 cells	ratio
1	118	5	0.0423729		1	108	3	0.0277778		1	275	29	0.105455
2	189	8	0.042328		2	142	3	0.0211268		2	260	42	0.161538
3	237	4	0.0168776		3	81	3	0.037037		3	269	42	0.156134
4	227	5	0.0220264		4	83	3	0.0361446		4	195	27	0.138462
5	179	8	0.0446927		5	116	2	0.0172414		5	198	24	0.121212
6	160	6	0.0375		6	100	7	0.07		6	147	16	0.108844
7	186	6	0.0322581		7	118	10	0.0847458		7	204	37	0.181373
8	215	9	0.0418605		8	116	5	0.0431034		8	230	23	0.1
9	251	6	0.0239044		9	116	5	0.0431034		9	404	37	0.0915842
10	277	11	0.0397112		10	100	10	0.1		10	284	37	0.130282
11	164	10	0.0609756		11	148	5	0.0337838		11	332	35	0.105422
12	184	7	0.0380435		12	170	3	0.0176471		12	242	19	0.0785124
13	188	10	0.0531915		13	173	12	0.0693642		13	229	20	0.0873362
14	240	9	0.0375		14	121	7	0.0578512		14	310	33	0.106452
15	181	8	0.0441989		15	116	3	0.0258621		15	326	37	0.113497
16	87	2	0.0229885		16	123	3	0.0243902		16	114	29	0.254386
17	91	4	0.043956		17	141	7	0.0496454		17	125	14	0.112
ave	186.706	6.94118	0.0379051			121.882	5.35294	0.0446367			243.765	29.4706	0.126617
std	51.5852	2.41248	0.0110924			25.2863	2.92939	0.0235883			74.7061	8.68479	0.0415826
	Anova: H3P+ cells
	SUMMARY
	Groups	Count	Sum	Average	Variance
	lwr/+	17	118	6.94118	6.18382
	ush/+	17	91	5.35294	9.11765
	lwr/ush	17	501	29.4706	80.1397
	ANOVA
	Source of Variation	SS	df	MS	F	P-value	F crit
	Between Groups	6186.63	2	3093.31	97.232	1.31296e-17	3.19073
	Within Groups	1527.06	48	31.8137
	Total	7713.69	50
	Anova: ratio of H3P+ to Dapi+ cells
	SUMMARY
	Groups	Count	Sum	Average	Variance
	lwr/+	17	0.644386	0.0379051	0.000130731
	ush/+	17	0.758824	0.0446367	0.000591184
	lwr/ush	17	2.15249	0.126617	0.00183719
	ANOVA
	Source of Variation	SS	df	MS	F	P-value	F crit
	Between Groups	0.0829365	2	0.0414683	48.6127	2.88914e-12	3.19073
	Within Groups	0.0409456	48	0.000853034
	Total	0.123882	50

## Sheet: Sheet6
S2 Fig Prohemocyte function of Toll pathway members Dorsal, Cact and Dif (panels A-C)
	densitometric			densitometric
dome/+	mean		dome>dlRNAi	mean
1	5418		1	1957
2	4317		2	1629
3	8166		3	1921
4	3251		4	1484
5	3168		5	1109
6	7392		6	1182
7	6797		7	1166
8	4684		8	3112
9	4438		9	3343
10	4189		10	2250
11	4015		11	2300
12	3826		12	1987
13	3925		13	1362
14	3847		14	1195
15	3870		15	1090
16	4749		16	1096
17	4339		17	1379
ave	4728.88			1738.94
std	1381.92			672.609
ttest	3.25953e-08
S2 Fig Prohemocyte function of Toll pathway members Dorsal, Cact and Dif (panel D)
	area μm2	area μm2	ratio					area μm2	area μm2	ratio
Dome/+	lymph gland	Odd-exp. Cells*					Dome>DifRNAI	lymph gland	Odd-exp. Cells
1	16620	9689	0.582972				1	28318	15808	0.558232
2	16892	11980	0.709211				2	35833	22634	0.631652
3	12760	8770	0.687304				3	12859	7297	0.567462
4	14218	8996	0.632719				4	16729	11275	0.673979
5	19890	12029	0.604776				5	14873	9359	0.629261
6	18822	10231	0.543566				6	17606	9903	0.562479
7	23213	12637	0.544393				7	24291	15225	0.626775
8	15748	9455	0.600394				8	36832	21749	0.590492
9	14065	7829	0.55663				9	12370	8495	0.686742
10	22602	13462	0.595611				10	13856	8192	0.591224
11	19116	10642	0.556706				11	17645	9995	0.566449
12	17570	8781	0.499772				12	14319	7198	0.502689
13	20184	12517	0.620145				13	19633	10815	0.550858
14	11943	8231	0.68919				14	13035	5254	0.403069
15	16410	9541	0.581414				15	17761	9053	0.509712
ave	17336.9	10319.3	0.60032					19730.7	11483.5	0.576738
std	3233.88	1726.3	0.0575814					7753.15	4983.33	0.0691752
ttest		0.210043
		*Odd-expressing cells
S2 Fig Prohemocyte function of Toll pathway members Dorsal, Cact and Dif (panel E)
	area μm2	area μm2	ratio					area μm2	area μm2	ratio
w1118	lymph gland	Odd-exp. Cells*					Dif2/+	lymph gland	Odd-exp. Cells
1	15455	4552	0.294533				1	12074	6815	0.564436
2	13384	4819	0.360057				2	10720	5976	0.557463
3	5608	3353	0.597896				3	10998	6733	0.612202
4	5312	3046	0.573419				4	7782	4926	0.632999
5	11605	7749	0.667729				5	7516	3783	0.503326
6	9555	5581	0.584092				6	7434	5199	0.699354
7	9583	7196	0.750913				7	7722	4545	0.588578
8	9492	5582	0.588074				8	8420	4644	0.551544
9	13679	7601	0.555669				9	10625	5724	0.538729
10	16172	7820	0.483552				10	7051	4580	0.649553
11	7186	5077	0.706513				11	6400	4137	0.646406
12	7705	4398	0.570798				12	9306	5965	0.640984
13	12865	6679	0.519161				13	12480	8148	0.652885
14	15218	11783	0.77428				14	8981	5282	0.58813
15	4461	2823	0.632818				15	9425	6347	0.673422
16	8689	4643	0.534354				16	6983	4110	0.588572
17	11038	6874	0.622758				17	8698	4590	0.527708
ave	10412.2	5857.41	0.577448					8977.35	5382.59	0.600958
std	3568.82	2164.08	0.119125					1786.27	1131.43	0.0540806
ttest		0.305249
		*Odd-expressing cells
S2 Fig Prohemocyte function of Toll pathway members Dorsal, Cact and Dif (panels F-H)
Panel A	densitometric			densitometric
Tep/+	mean		Tep>cactRNAi	mean
1	9603		1	1746
2	8054		2	1943
3	6938		3	5106
4	6009		4	8771
5	4868		5	5099
6	6067		6	4169
7	6051		7	3536
8	5143		8	5051
9	6781		9	1813
10	8169		10	3626
11	10301		11	4626
12	10481		12	6904
13	10802		13	7159
14	4232		14	8609
15	6445		15	8025
ave	7329.6			5078.87
std	2063.35			2303.12
ttest	0.00552923
S2 Fig Prohemocyte function of Toll pathway members Dorsal, Cact and Dif (panel I)
								lobes	lobes	Total
								< 5 lamellocytes	>5 lamellocytes
							dome/+	15	3	18
							dome>cactRNAi	7	9	16
							Total	22	12	34
								P = 0.0294
S2 Fig Prohemocyte function of Toll pathway members Dorsal, Cact and Dif (panel J)
	area μm2	area μm2	#				area μm2	area μm2	#
dome/+	lymph gland	Odd-exp. Cells*	Odd-exp. cells			dome>dlRNAi	lymph gland	Odd-exp. cells	Odd-exp. cells
1	14982	6354	352			1	16983	7644	788
2	12992	4948	416			2	12046	7105	447
3	12706	5840	454			3	11729	8039	573
4	19626	5953	486			4	10713	8028	430
5	18901	4717	291			5	14098	8190	519
6	19117	5487	323			6	17287	8177	423
7	13058	5468	322			7	9254	7706	500
8	13042	6076	345			8	7305	5800	421
Ave	15553	5605.38	373.625				12426.9	7586.12	512.625
std	2915.92	525.839	65.4082				3298.52	754.453	115.779
ttest			0.00914734
		*Odd-expressing cells
S2 Fig Prohemocyte function of Toll pathway members Dorsal, Cact and Dif (panel K)
	area μm2	area μm2	#				area μm2	area μm2	#
Tep/+	lymph gland	Odd-exp. Cells*	Odd-exp. cells			Tep>dl	lymph gland	Odd-exp. cells	Odd-exp. cells
1	9134	5012	460			1	12438	4826	264
2	12270	4822	416			2	8274	3624	157
3	7139	4312	317			3	7635	2799	134
4	6305	3888	329			4	9191	3069	189
5	7213	4249	240			5	6444	3005	179
6	6895	3676	234			6	6456	3104	192
AVE	8159.33	4326.5	332.667				8406.33	3404.5	185.833
STD	2033.93	472.066	83.406				2046.83	682.878	40.2551
ttest			0.00447954
		*Odd-expressing cells
S2 Fig Prohemocyte function of Toll pathway members Dorsal, Cact and Dif (panel L)
	area μm2	area μm2	#				area μm2	area μm2	#
Dome/+	lymph gland	Odd-exp. Cells*	Odd-exp. cells			Dome>DifRNAi	lymph gland	Odd-exp. Cells	Odd-exp. cells
1	7486	4642	284			1	7122	4294	200
2	18011	4522	213			2	8397	3792	193
3	7055	3700	239			3	5778	3790	214
4	6264	3013	145			4	7845	3968	232
5	9078	4521	225			5	6002	4214	221
6	8057	4425	227			6	7813	4454	227
Ave	9325.17	4137.17	222.167				7159.5	4085.33	214.5
Std	3979.53	589.915	41.1842				972.808	252.668	14.0089
ttest			0.35342
S2 Fig Prohemocyte function of Toll pathway members Dorsal, Cact and Dif (panel M)
Tep/+	area μm2	area μm2	#			Tep>cactRNAi	area μm2	area μm2	#
	lymph gland	Odd-exp. Cells*	Odd-exp. cells				lymph gland	Odd-exp. Cells	Odd-exp. cells
1	13445	7702	350			1	9545	4993	248
2	13724	7032	312			2	13721	4407	150
3	10835	6628	276			3	7975	4219	187
4	8174	5820	300			4	9817	4982	227
5	6598	5499	297			5	10082	4265	282
6	5267	5617	403			6	12481	5194	206
Ave	9673.83	6383	323				10603.5	4676.67	216.667
STD	3243.05	806.863	42.1584				1921.97	389.995	42.4172
ttest			0.00130948
		*Odd-expressing cells
			S3 Fig Activity of the 7.5 kb ush CRM-lacZ transgene does not increase in dl heterozygotes
	densitometric						densitometric
control (+)	mean					dl/+	mean
1	11800					1	11063
2	9048					2	7363
3	9969					3	8109
4	8874					4	6083
5	4210					5	6652
6	3654					6	3784
7	7444					7	10018
8	6893					8	11235
9	3403					9	5705
10	3145					10	5276
11	7842					11	4029
12	6300					12	7409
ave	6881.83						7227.17
std	2701.55						2402.12
ttest	0.377201
	S4 Fig Ush antagoinizes Dorsal-driven prohemocyte loss (panel A)
	area μm2	area μm2	#				area μm2	area μm2	#
Tep/+	lymph gland	Odd-exp. Cells*	Odd-exp. cells			Tep>Ush	lymph gland	Odd-exp. cells	Odd-exp. cells
1	6676	709	59				1	1805	1279	131
2	4302	1341	111				2	2042	1107	112
3	5247	917	78				3	1871	1428	116
4	6174	953	113				4	4951	1710	156
5	2287	625	83				5	2250	1779	177
6	2596	1019	111				6	2232	1103	83
Ave	4547	927.333	92.5					2525.17	1401	129.167
STD	1665.52	230.71	20.5244					1097.45	267.463	30.58
ttest			0.0269319
		*Odd-expressing cells
	S4 Fig Ush antagoinizes Dorsal-driven prohemocyte loss (panel B)
	area μm2	area μm2	#				area μm2	area μm2	#
cactRNAi	lymph gland	Odd-exp. Cells*	Odd-exp. cells			cactRNAi,Ush	lymph gland	Odd-exp. cells	Odd-exp. cells
1	6112	2855	194			1	9091	5149	268
2	7169	3348	191			2	9956	5027	317
3	7446	0	0			3	5038	3621	415
4	8405	0	0			4	5536	3829	290
5	5563	3053	205			5	6903	4319	211
6	5901	3574	252			6	6154	3794	221
7	6945	3852	190			7	5869	3521	237
8	5670	4099	215			8	8052	4114	304
Ave	6651.38	2597.62	155.875				7074.88	4171.75	282.875
std	939.576	1545.67	91.9204				1664.67	580.782	61.6835
ttest			0.0050779
		*Odd-expressing cells
	S4 Fig Ush antagoinizes Dorsal-driven prohemocyte loss (panel C)
	area μm2	area μm2	#				area μm2	area μm2	#
ush/+	lymph gland	Odd-exp. Cells*	Odd-exp. cells			dl/ush	lymph gland	Odd-exp. cells	Odd-exp. cells
1	4771	3397	204			1	5873	3931	179
2	4021	2953	142			2	6984	4620	238
3	3852	2769	203			3	7162	4787	193
4	3855	3006	122			4	8138	4900	261
5	2663	2509	140			5	4826	3679	185
6	5811	2819	138			6	4697	3983	226
Ave	4162.17	2908.83	158.167				6280	4316.67	213.667
STD	961.536	269.935	32.7028				1259.06	469.076	30.098
ttest			0.00958164
		*Odd-expressing cells

## Sheet: Sheet7
S5 Fig: Prohemocyte-specific knockdown of Dif does not promote crystal cell differentiation
dome/+	Total Cells	crystal cells	ratio		dome>DifRNAi	Total Cells	crystal cells	ratio
1	700	70	0.1		1	590	147	0.249153
2	701	147	0.2097		2	719	115	0.159944
3	723	149	0.206086		3	433	110	0.254042
4	362	73	0.201657		4	535	74	0.138318
5	351	63	0.179487		5	495	59	0.119192
6	467	47	0.100642		6	294	67	0.227891
7	493	65	0.131846		7	85	15	0.176471
8	531	60	0.112994		8	247	23	0.0931174
9	218	27	0.123853		9	426	60	0.140845
10	219	50	0.228311		10	513	121	0.235867
11	426	100	0.234742		11	373	106	0.284182
12	521	111	0.213052		12	396	46	0.116162
13	379	44	0.116095		13	257	75	0.291829
14	200	56	0.28		14	340	83	0.244118
15	328	44	0.134146		15	359	88	0.245125
16	342	35	0.102339		16	327	47	0.143731
17	385	113	0.293506		17	403	43	0.1067
Averages		73.7647	0.174615				75.2353	0.189805
std		36.0499	0.0621771				34.9933	0.0648309
T-test		0.453763	0.251827
S6 Fig. Altering the expression of ush, cact or dl in prohemocytes
	had no effect on proliferation in mid-third instar larvae (panels A-C).
Dome>+	area μm2	# H3P+			Dome>ushRNAi	area μm2	# H3P+
	lymph gland	cells				lymph gland	cells
1	6000	39			1	15679	36
2	9157	36			2	18847	52
3	8217	57			3	14852	79
4	8110	35			4	5934	19
5	6639	19			5	12592	39
6	9203	40			6	4276	20
7	7503	31			7	6724	29
8	5597	24			8	14419	45
9	18352	64			9	16659	60
10	12526	39			10	15029	61
11	17036	59			11	11215	34
12	11020	49			12	9574	40
13	10808	45			13	6767	31
14	15581	56			14	7763	34
15	14215	35			15	5382	23
16	17904	34			16	8228	36
17	13184	55			17	21759	52
18	9454	20			18	11491	22
19	7123	27			19	4116	8
20	7447	32			20	2969	5
21	8060	25			21	11500	43
22	9810	37			22	11631	27
23	5333	11			23	9497	35
24	3771	14			24	9878	26
Averages	10085.4	36.7917				10699.2	35.6667
STD	4026.86	14.1891				4785.17	16.6249
T-Tests		0.403076
S6 Fig. Altering the expression of ush, cact or dl in prohemocytes
	had no effect on proliferation in mid-third instar larvae (panels D-F).
Dome/+	area μm2	# H3P+			Dome>CactRNAi	area μm2	# H3P+
	lymph gland	cells				lymph gland	cells
1	11265	48			1	11213	66
2	12028	60			2	7957	67
3	12678	45			3	11291	42
4	7841	48			4	8414	36
5	12826	53			5	8477	32
6	8846	67			6	4548	31
7	9551	49			7	4813	32
8	6969	79			8	8303	97
9	4862	33			9	6433	79
10	16257	89			10	9959	88
11	4500	53			11	11270	61
12	5240	19			12	8419	61
13	13551	61			13	10874	24
14	8540	52			14	9992	35
15	9915	56			15	7756	39
16	11617	53			16	5850	41
17	12455	58			17	6879	35
18	8289	58			18	4992	35
19	10103	42			19	6574	58
20	9714	37			20	5167	24
21	6011	52			21	11638	25
AVE	9669.43	52.9524				8134.24	48
STD	3045.19	14.4831				2299.19	21.139
ttest		0.196618
S6 Fig. Altering the expression of ush, cact or dl in prohemocytes
	had no effect on proliferation in mid-third instar larvae (panels G-I).
Tep/+	area μm2	# H3P+			Tep>dlGOF	area μm2	# H3P+
	lymph gland	cells				lymph gland	cells
1	4727	39			1	5916	29
2	7996	35			2	7775	27
3	6504	44			3	6569	27
4	7992	76			4	5589	32
5	7526	30			5	5739	25
6	6438	17			6	4443	23
7	10249	44			7	6616	32
8	8345	19			8	6190	39
9	5165	14			9	9717	40
10	6352	31			10	10680	22
11	3479	17			11	4981	27
12	9283	23			12	7848	17
13	7690	25			13	7643	18
14	7764	22			14	7613	28
15	8041	23			15	12563	38
16	7561	34			16	5062	18
17	5227	35			17	4833	18
18	3937	24			18	5149	17
19	5206	38			19	5034	22
AVE	6814.84	31.0526				6840	26.2632
STD	1766.55	13.8354				2122.52	7.22453
ttest		0.101949
S6 Fig. Altering the expression of ush, cact or dl in prohemocytes
	had no effect on proliferation in mid-third instar larvae (panels J-L).
Dome>+	area μm2	# H3P+			Dome>DlRNAi	area μm2	# H3P+
	lymph gland	cells				lymph gland	cells
1	3056	15			1	5662	32
2	3332	23			2	5203	24
3	3488	20			3	9553	31
4	3459	24			4	5958	33
5	7771	30			5	7044	26
6	7630	17			6	9417	32
7	7486	40			7	8221	55
8	10656	79			8	6557	46
9	2016	10			9	5882	22
10	7181	49			10	4759	30
11	5024	34			11	6059	32
12	4078	18			12	7938	28
13	3101	13			13	3606	20
14	3792	21			14	5226	19
15	4629	19			15	5068	18
AVE	5113.27	27.4667				6410.2	29.8667
STD	2359.53	17.1187				1660.77	9.6185
T-Tests		0.325956
